# Supplementary material for: AlCl3-graphite intercalation compounds as negative electrode materials for lithium-ion capacitors
Source: Royal Society of Chemistry journal article supplement (doi:10.1039/d1ta08378c), 2021-01-01
Supplement: d1ta08378c1.pdf [file d1ta08378c1.pdf]

## Supporting Information

### **AlCl<sub>3</sub>-Graphite Intercalation Compounds as Negative Electrode Materials in Lithium-ion Capacitors**

Yamato Haniu<sup>a</sup>, Hiroki Nara<sup>b, c, \*</sup>, Seongki Ahn<sup>d</sup>, Toshiyuki Momma<sup>a, b, \*</sup>, Wataru  
Sugimoto<sup>e</sup>, and Tetsuya Osaka<sup>b</sup>

<sup>a</sup> *Faculty of Science and Engineering, Waseda University*

*3-4-1, Okubo, Shinjuku-ku, Tokyo 169-8555, Japan*

<sup>b</sup> *Research Organization for Nano and Life Innovation, Waseda University*

*513, Wasedatsurumakicho, Shinjuku-ku, Tokyo 162-0041, Japan*

<sup>c</sup> *JST-ERATO Yamauchi Materials Space-Tectonics Project, Kagami Memorial  
Research Institute for Materials Science and Technology, Waseda University*

*2-8-26 Nishiwaseda, Shinjuku, Tokyo 169-0051, Japan*

<sup>d</sup> *Department of New Energy and Mining Engineering, Sangji University*

*83 Sangjidae-gil, Wonju-si, Gangwon-do, Republic of Korea*

<sup>e</sup> *Faculty of Textile Science and Technology, Shinshu University*

*3-15-1 Tokida, Ueda, Nagano, 386-8567, Japan*

\*Corresponding author. HN; Tel: +81-3-6265-9937, E-mail: [h-nara@aoni.waseda.jp](mailto:h-nara@aoni.waseda.jp), TM; Tel: +81-3-5286-8537, Fax: +81-3-3205-2074, E-mail: [momma@waseda.jp](mailto:momma@waseda.jp)

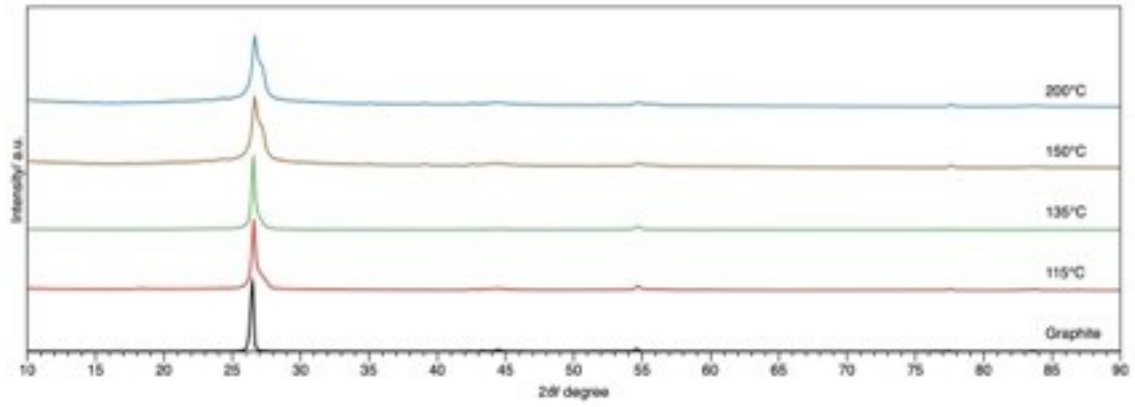

Figure S1. XRD patterns in a wide range of  $\text{AlCl}_3$ -GICs synthesized at different temperatures and labeled according to the heating temperature (115, 135, 150, 200).

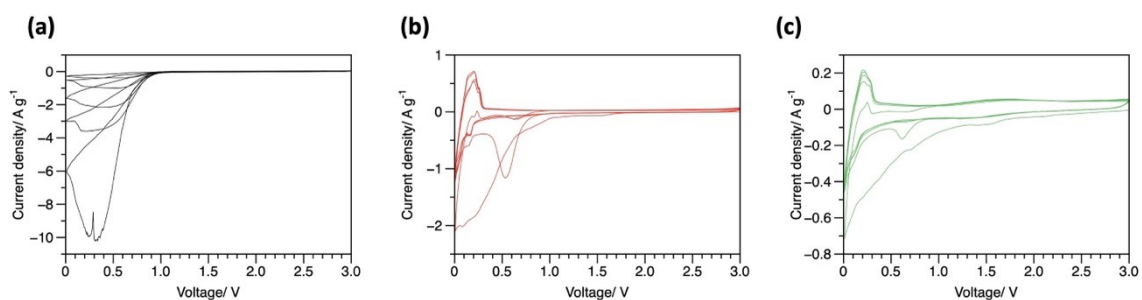

Figure S2. Cyclic voltammograms of (a) graphite, (b) and (c)  $\text{AlCl}_3\text{-GIC}$  (115 and 200) measured using 2032-type coin cells with 1 M  $\text{LiPF}_6$  in PC as the electrolyte and Li metal foil as the counter electrode. CV was obtained in a voltage range of 0.01-3.0 V with a scan rate of  $0.2 \text{ mV s}^{-1}$ .

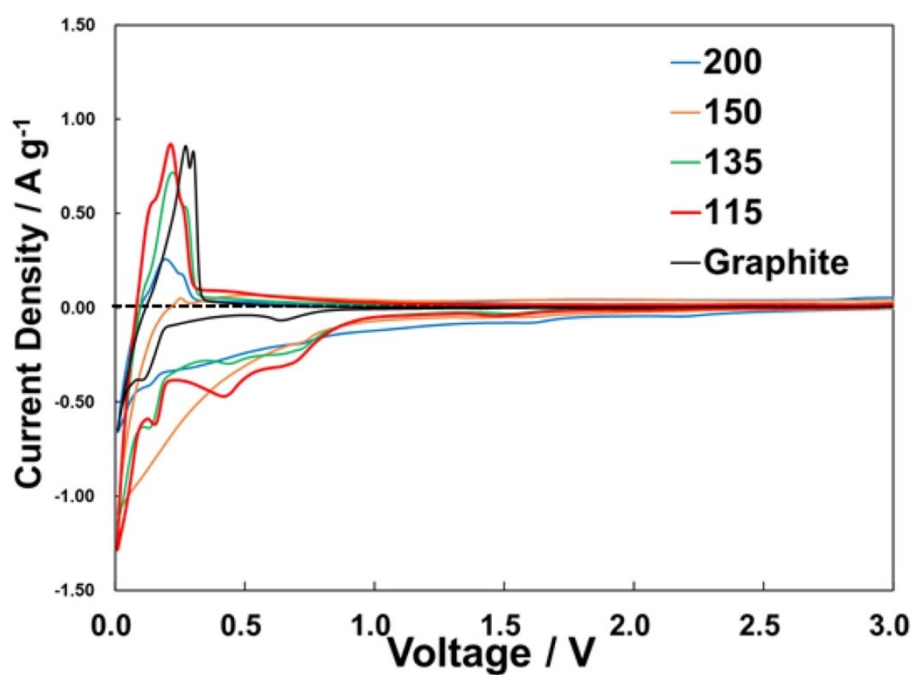

Figure S3. Cyclic voltammogram at an initial cycle of graphite and AlCl<sub>3</sub>-GICs (115, 135, 150, and 200). CV was obtained in a voltage range of 0.01-3.0 V with a scan rate of 0.2 mV s<sup>-1</sup>.

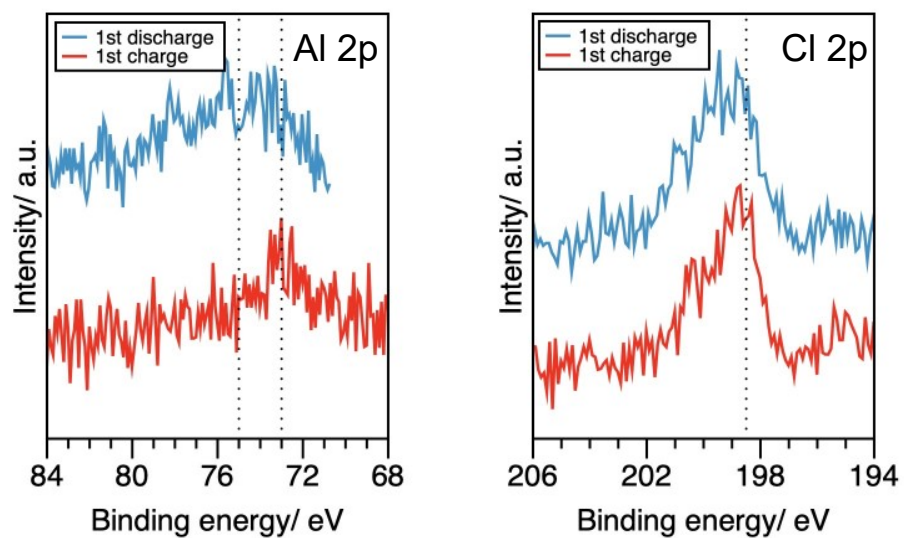

Figure S4. Binding energy of Al2p and Cl2p of AlCl<sub>3</sub>-GIC (115) measured after 1<sup>st</sup> charge (lithiation) and 1<sup>st</sup> discharge (delithiation).

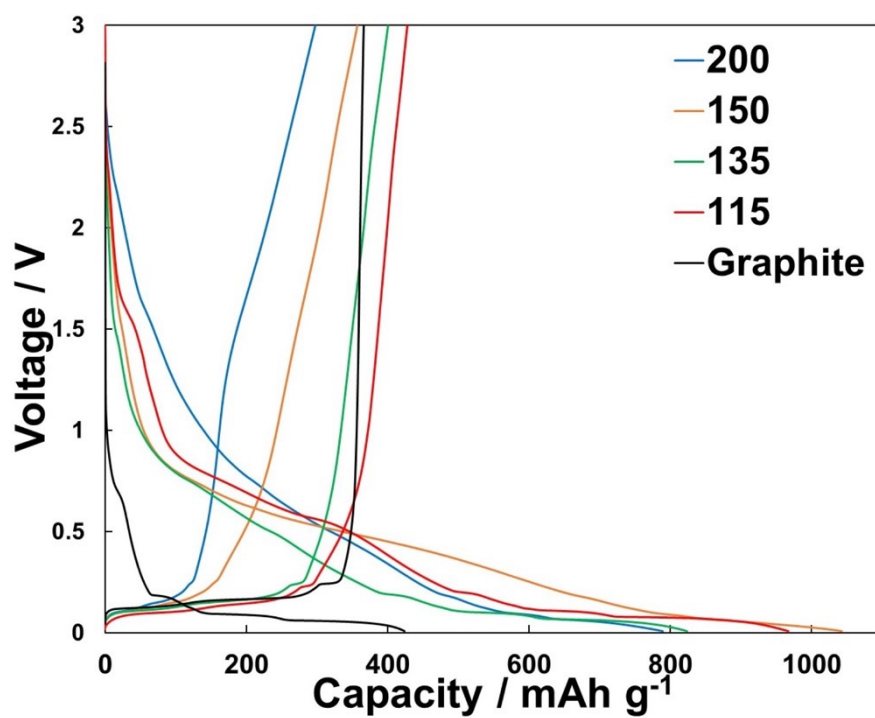

Figure S5. Initial charge/discharge curves cycled at 0.1 A g<sup>-1</sup> in a voltage range of 0.01-3.0 V of a half-cell composed of graphite and AlCl<sub>3</sub>-GICs (115, 135, 150, and 200).

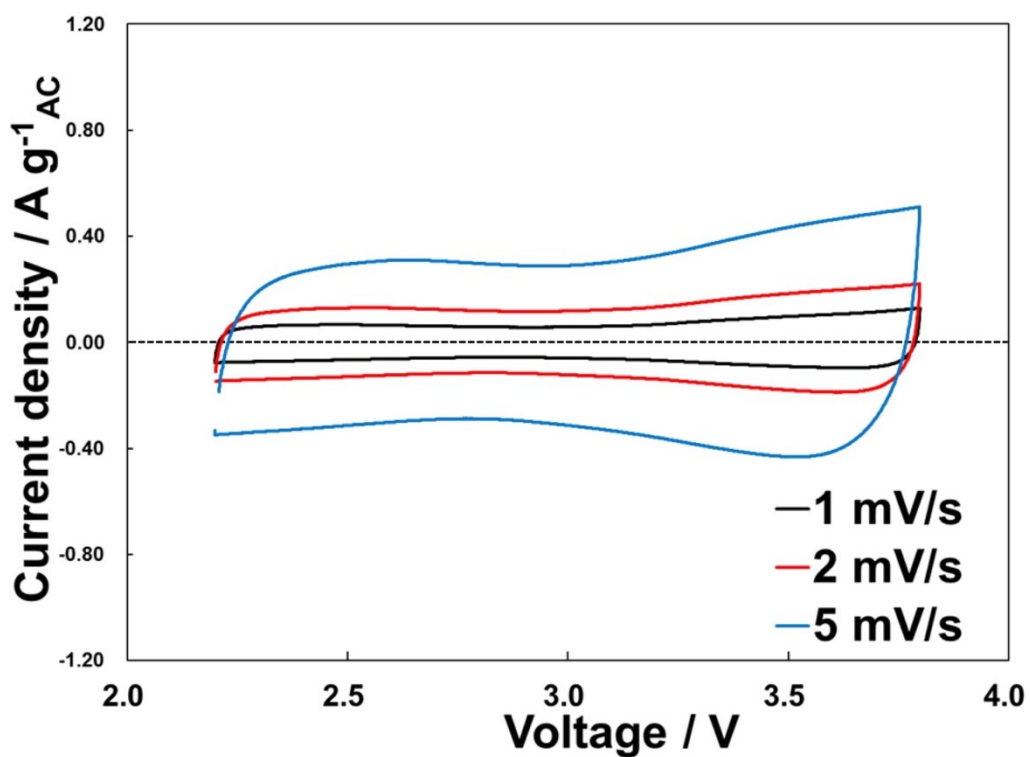

Figure S6. Cyclic voltammogram of LICs composed of AlCl<sub>3</sub>-GICs (115) negative electrode after pre-lithiation and AC positive electrode with 3:1 capacity ratio. CV was obtained in the voltage range of 2.2-3.8 V at scan rates of 1.0, 2.0, 5.0 mV s<sup>-1</sup>.

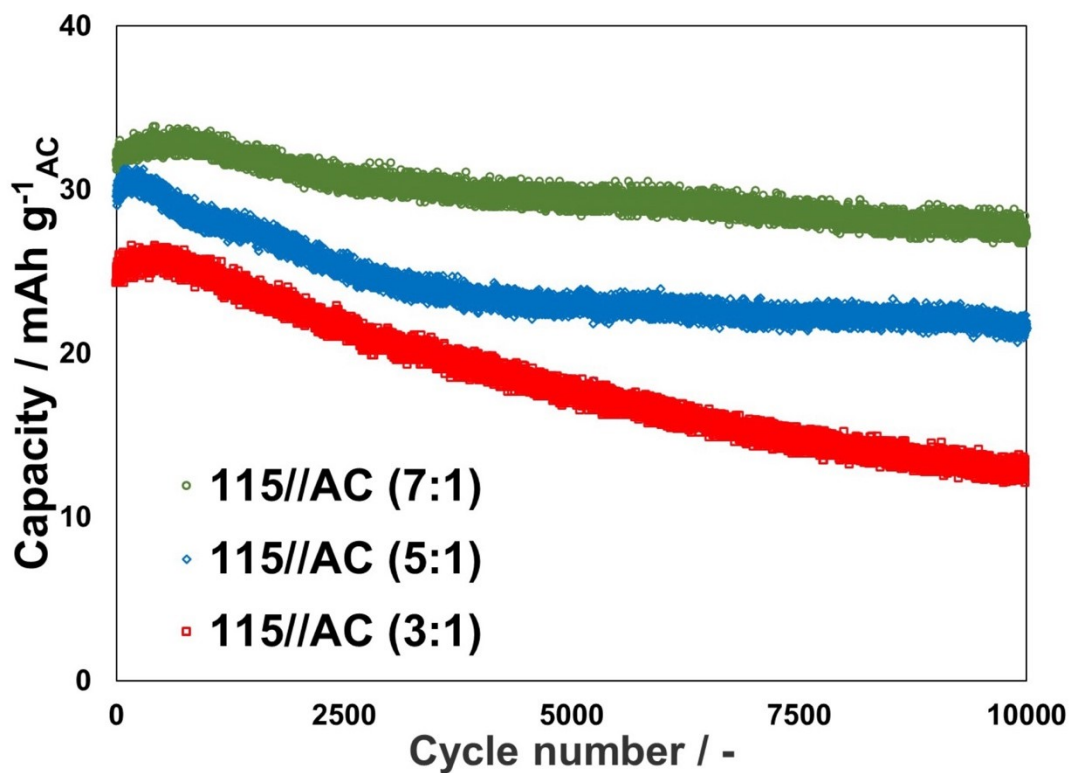

Figure S7. Discharge capacity cycled at 1.0 A g<sup>-1</sup> of LICs composed of AlCl<sub>3</sub>-GICs (115) negative electrode after pre-lithiation and AC positive electrode with capacity ratios of 3:1, 5:1, and 7:1. Charge/discharge test was carried out in a voltage range of 2.2-3.8 V at a current density of 1.0 A g<sup>-1</sup> AC.
